# Supplementary material for: Enhancing corrosion resistance of mild steel in hydrochloric acid with Chiquita banana sap extract
Source: Royal Society of Chemistry journal article supplement (doi:10.1039/d4ra00132j), 2024-01-01
Supplement: d4ra00132j1.pdf [file d4ra00132j1.pdf]

## **Enhancing corrosion resistance of mild steel in hydrochloric acid with Chiquita banana sap extract**

Nhon Pham Van,<sup>a,b,#</sup> Ngoc Cam Tu Hoang,<sup>a,b,#</sup> Tran Dinh Manh,<sup>c</sup> Le Thuy Dung,<sup>d</sup> Nguyen Si Hoai Vu,<sup>a,b</sup> S. V. Prabhakar Vattikuti,<sup>e</sup> Casen Panaitescu,<sup>f</sup> Trung T. Pham,<sup>g</sup> Nam Nguyen Dang<sup>a,b,\*</sup>

<sup>a</sup>Faculty of Civil Engineering, Duy Tan University, Danang 550000, Vietnam

<sup>b</sup>Future Materials & Devices Lab., Institute of Fundamental and Applied Sciences, Duy Tan University, Ho Chi Minh City 700000, Viet Nam

<sup>c</sup>Institute of Applied Technology, Thu Dau Mot University, 6 Tran Van On Street, Phu Hoa Ward, Thu Dau Mot City, Binh Duong 820000, Vietnam

<sup>d</sup>Petrovietnam Manpower Training College, 762 Cach Mang Thang Tam Street, Long Toan Ward, Ba Ria City 790000, Vietnam

<sup>e</sup>School of Mechanical Engineering, Yeungnam University, Gyeongsan 38541, Republic of Korea

<sup>f</sup>Department of Petroleum Geology and Reservoir Engineering, Petroleum-Gas University of Ploiesti, 100680 Ploiesti, Romania

<sup>g</sup>Namur Institute of Structured Matter (NISM), Department of Physics, University of Namur, 61 Rue de Bruxelles, Namur B-5000, Belgium

\*E-mail address: nguyendangnam@duytan.edu.vn

#Contributed equally to this work and these authors can put as the first author in the CV

**Table S1.** AS1020 steel compositions.

| Chemical elements (wt.%) |      |      |      |      |        |      |        |        |      |        |        |         |         |      |
|--------------------------|------|------|------|------|--------|------|--------|--------|------|--------|--------|---------|---------|------|
| C                        | Mn   | Si   | S    | P    | Ni     | Cr   | Mo     | Cu     | V    | Nb     | Ti     | Al      | B       | Fe   |
| 0.16                     | 0.73 | 0.21 | 0.01 | 0.02 | < 0.01 | 0.03 | < 0.01 | < 0.01 | 0.01 | < 0.01 | < 0.01 | < 0.005 | < 0.005 | Bal. |

**Table S2.** The concentrations of the compounds detected by Gas chromatography mass spectrometry (GC-MS) in Chiquita banana sap - water extract (BSWE).

| Peak | R.T. min | Library                                       | %Area | Quality |
|------|----------|-----------------------------------------------|-------|---------|
| 1    | 6.074    | Spirohexan-5-one                              | 6.50  | 35      |
| 2    | 10.630   | Spirohexan-5-one                              | 1.05  | 16      |
| 3    | 12.370   | 1,1-Bis(4-methoxyphenyl) ethene               | 0.13  | 7       |
| 4    | 14.919   | 1, 3, 5-Triazine, 2, 4, 6-tris(cyanomethoxy)- | 0.36  | 10      |
| 5    | 19.777   | Capsaicin                                     | 9.85  | 90      |
| 6    | 19.914   | Dihydrocapsaicin                              | 6.80  | 98      |

**Table S3.** Comparison between different plant extracts used as corrosion inhibitors for material in corrosion acid media.

| Extract                      | Corrosion medium                            | Concentration | Inhibition performance (%) | Ref.      |
|------------------------------|---------------------------------------------|---------------|----------------------------|-----------|
| Velvet Tamarind              | 1.0 M HCl                                   | 50 % (v/v)    | 88.0                       | [43]      |
| Ferula assa-foetida          | 2.0 M HCl                                   | 0.8 (g/L)     | 96.0                       | [44]      |
| Dorema ammoniacum            | 2.0 M HCl                                   | 0.8 (g/L)     | 91.3                       | [44]      |
| Pachylobus edulis            | 2.0 M H <sub>2</sub> SO <sub>4</sub>        | 0.5 (g/L)     | 48.0                       | [45]      |
| Azadirachta indica gum       | 1.0 M HCl                                   | 60 (ppm)      | 81.7                       | [46]      |
| Boswellia serrata gum        | 1.0 M HCl                                   | 500 (ppm)     | 95.5                       | [47]      |
| Canarium schweinfurthii tree | 0.1 M HCl                                   | 0.1 (g/L)     | 90.4                       | [48]      |
| Guar gum                     | 1.0 M<br>2.0 H <sub>2</sub> SO <sub>4</sub> | 1500 (ppm)    | 93.4                       | [49]      |
| Locust Bean Gum              | 0.5 M<br>H <sub>2</sub> SO <sub>4</sub>     | 5 (mM)        | 89.8                       | [50]      |
| Musa Paradisiaca Stem Sap    | 0.5 M HCl                                   | 50 % (v/v)    | 87.1                       | [51]      |
| Chiquita banana sap          | 0.1 M HCl                                   | 2000 (ppm)    | 94.2                       | This work |

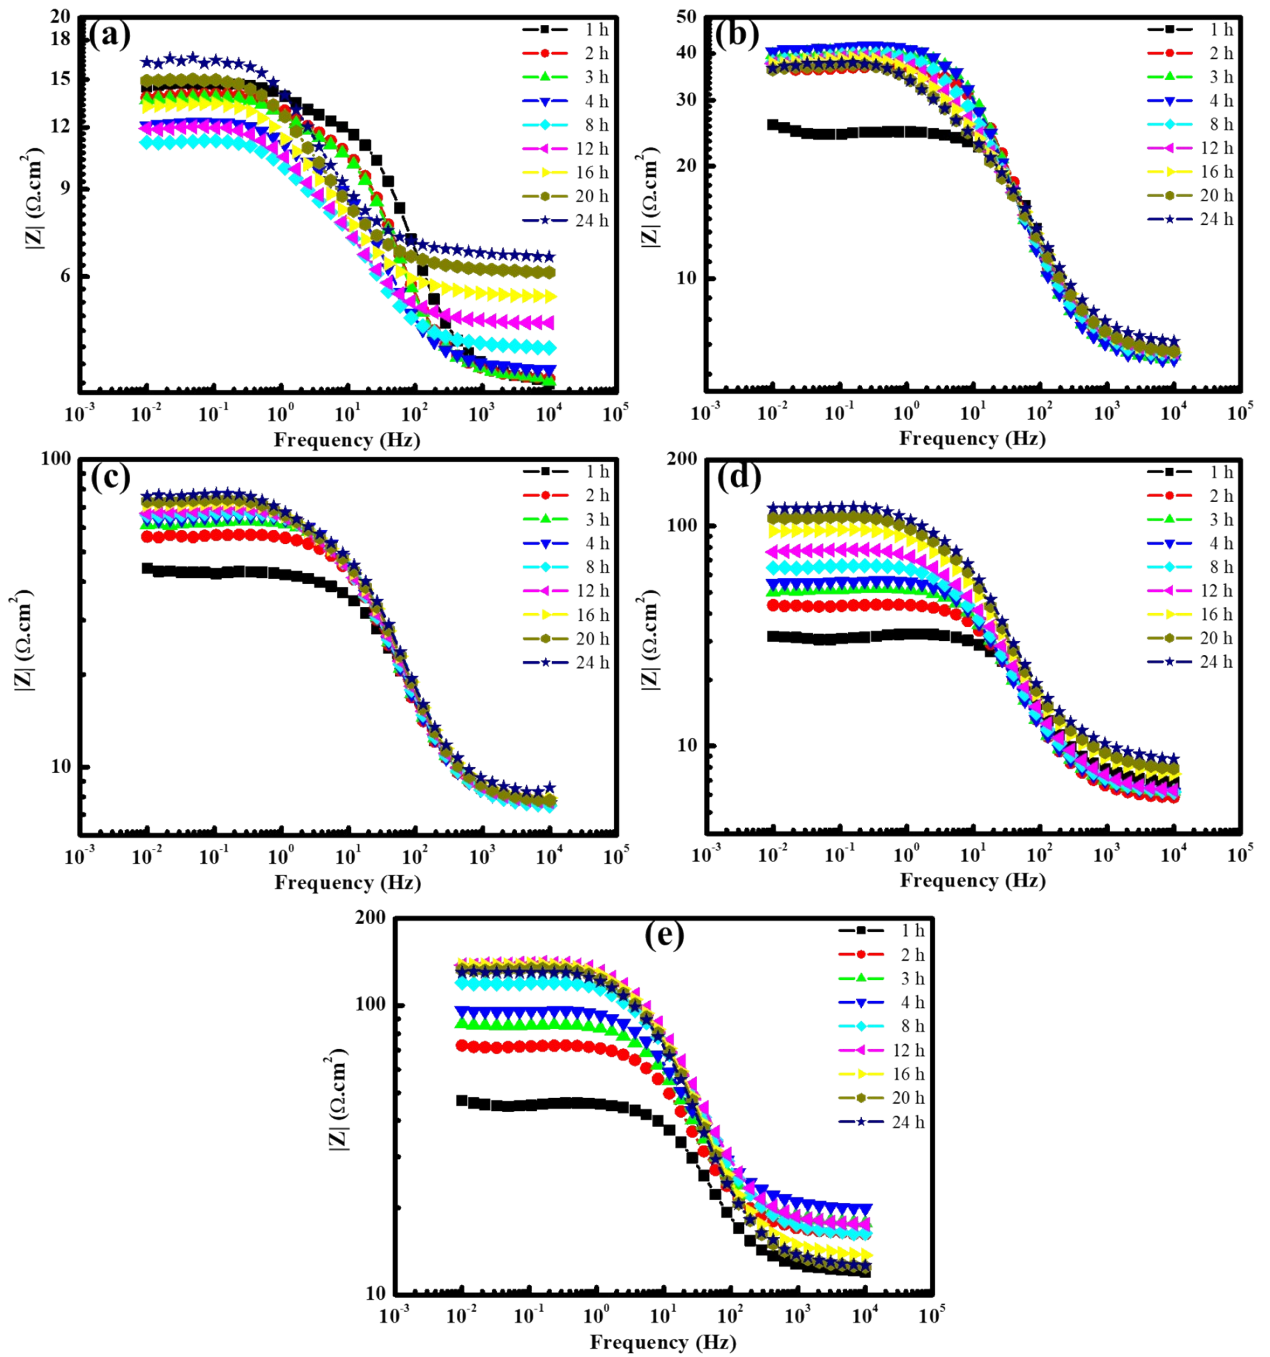

**Figure S1.** EIS results in the form of Bode plots (impedance vs frequency) of steel exposed to 0.1 M HCl solution containing (a) 0, (b) 500, (c) 1000, (d) 1500, and (e) 2000 ppm BSWE.

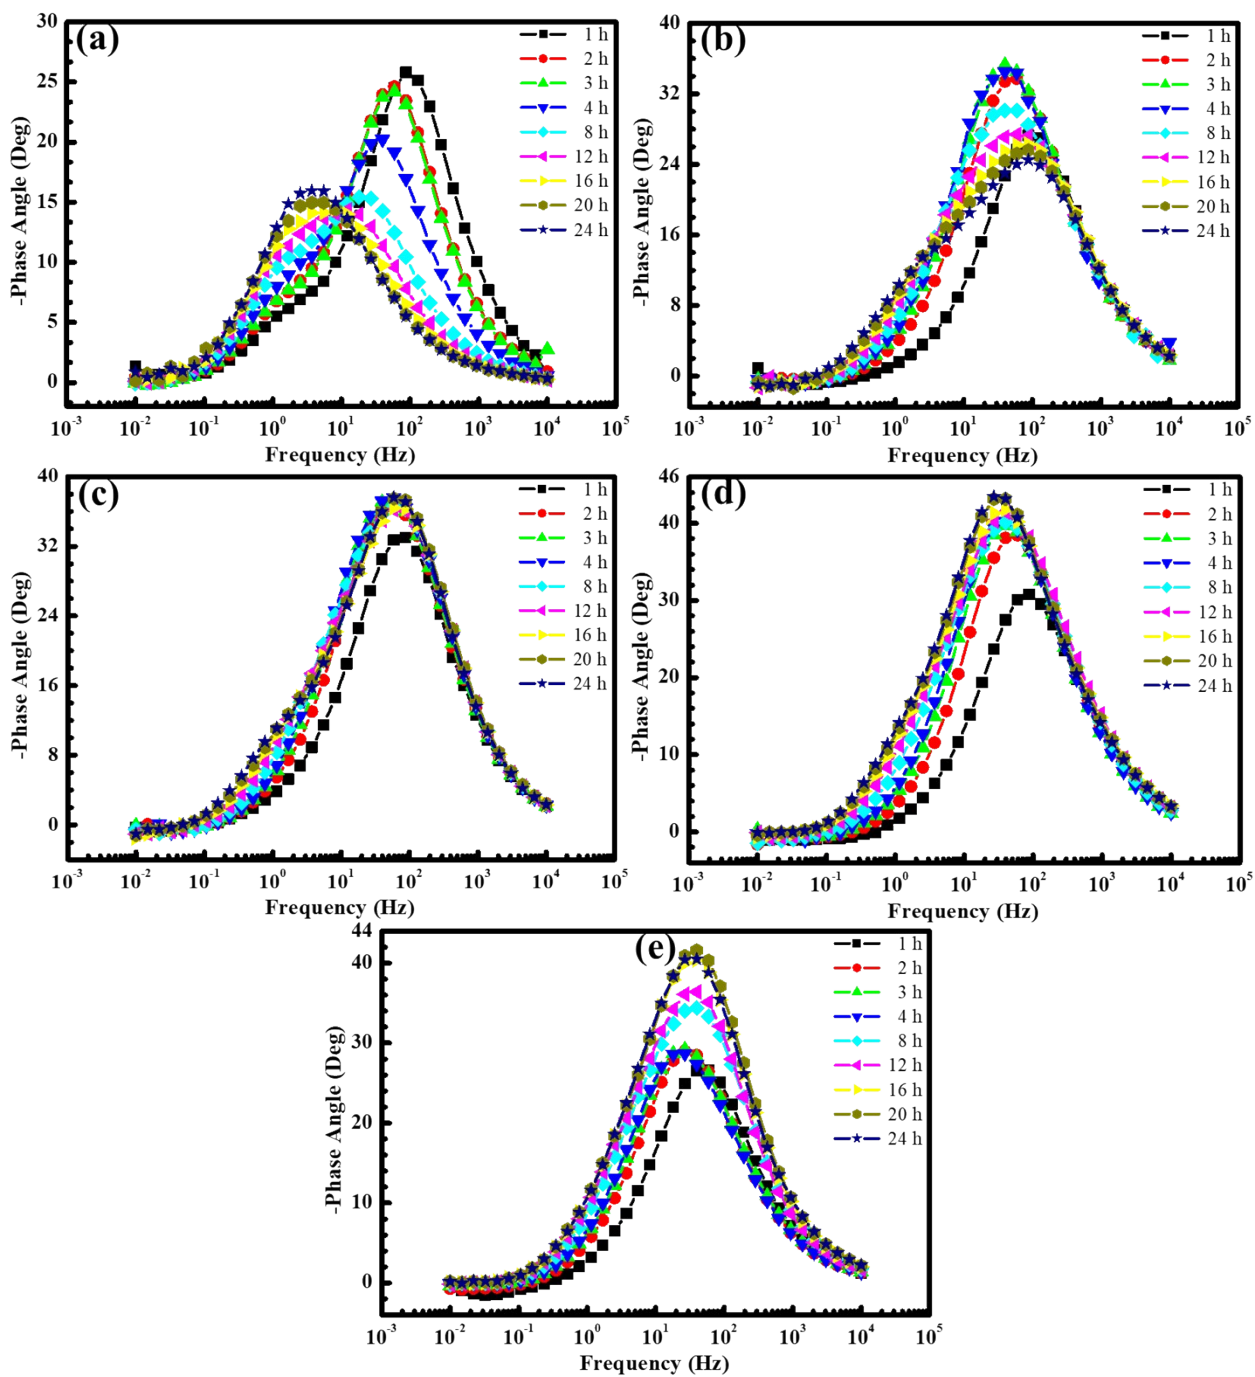

**Figure S2.** EIS results in the form of Bode plots (phase angle vs frequency) of steel exposed to 0.1 M HCl solution containing (a) 0, (b) 500, (c) 1000, (d) 1500, and (e) 2000 ppm BSWE.

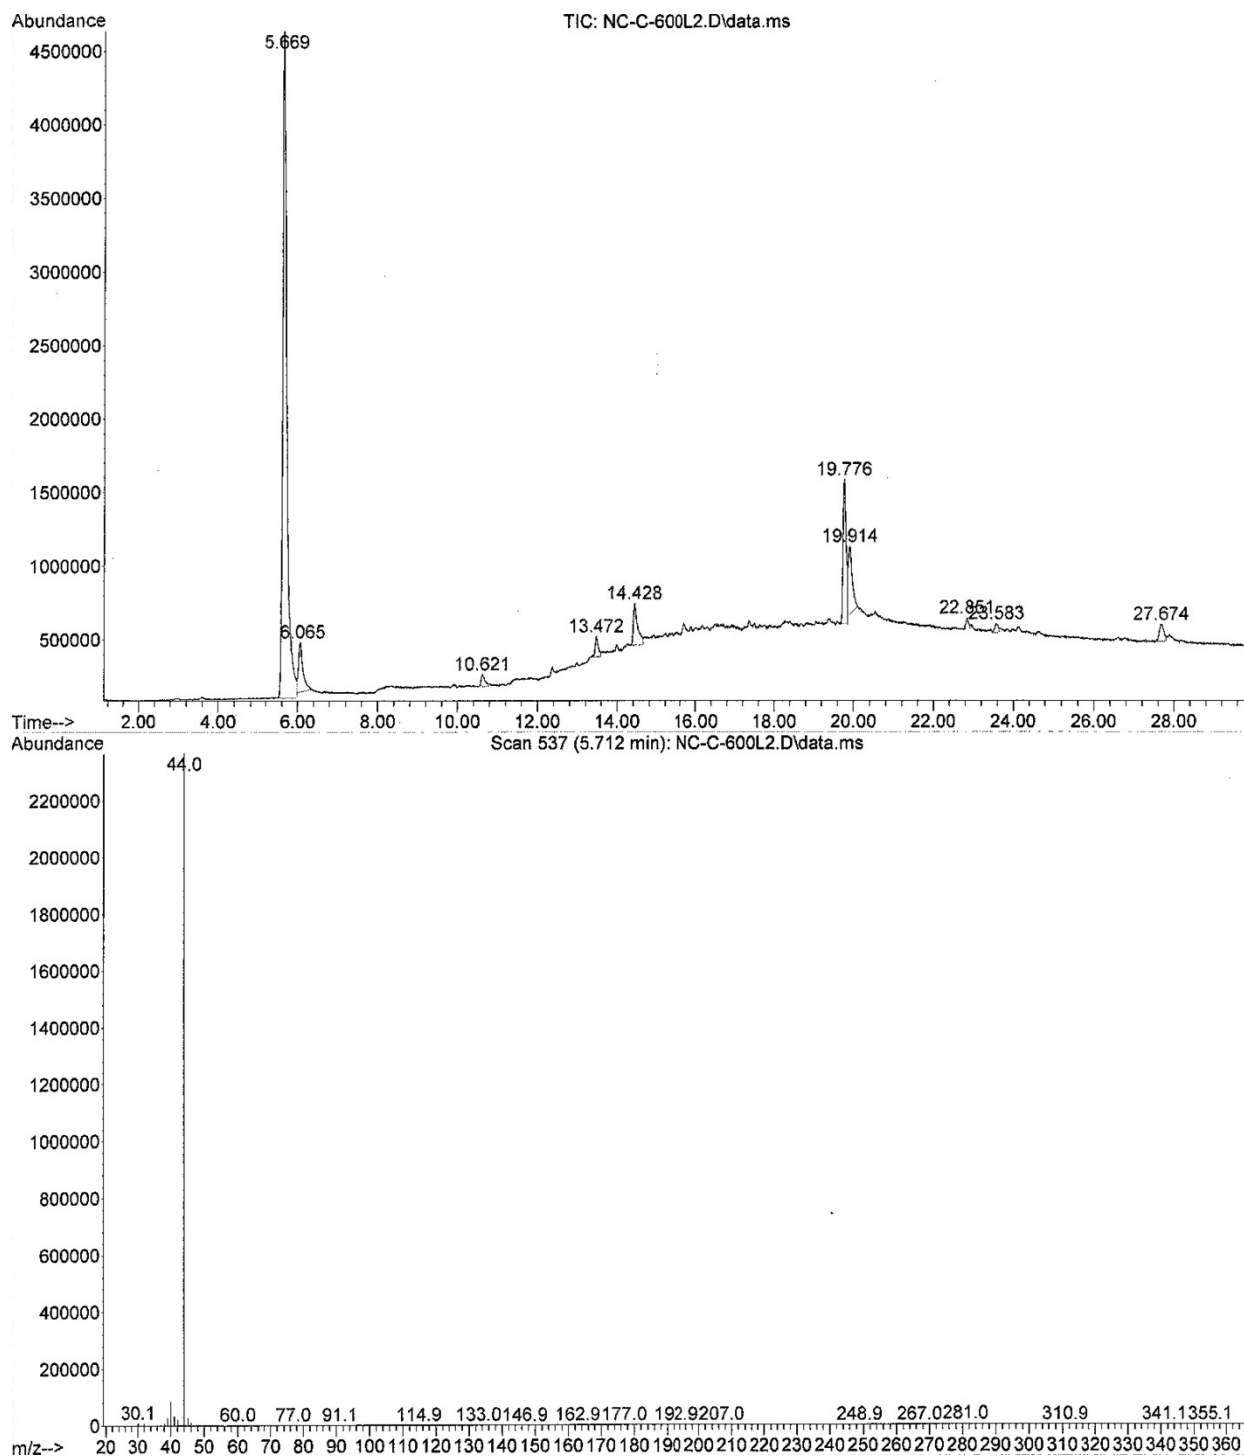

**Figure S3.** Gas chromatography–mass spectrometry result of Chiquita banana sap - water extract (BSWE) at 600 °C.

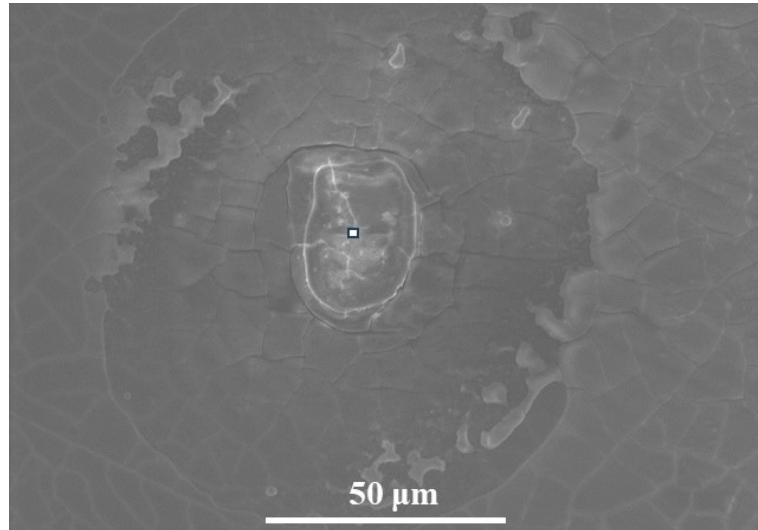

(a)

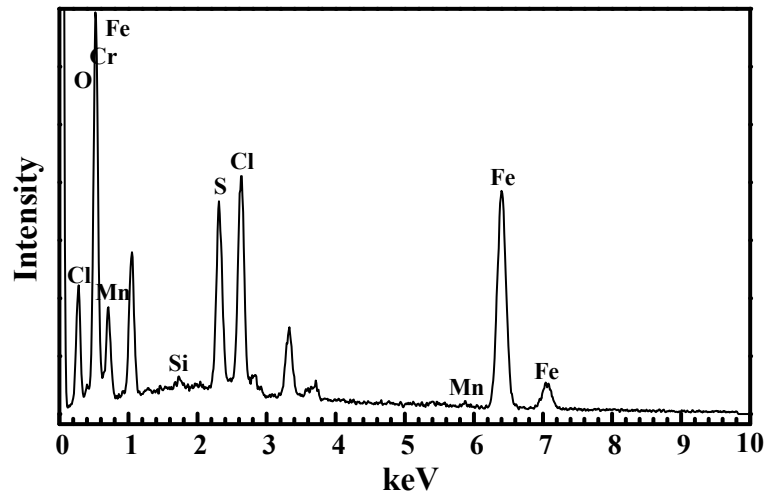

(b)

**Figure S4.** (a) SEM/EDS of AS1020 steel surface after 15 mins corrosion happen in 0.1 M HCl solution.
